# Supplementary material for: Chronosequence and Temporal Changes in Soil Traits, Vegetation Structure and Leaf Traits in a Tropical Dry Forest in Brazil
Source: Preprints.org preprint supplement (doi:10.20944/preprints202408.1237.v1), 2024-08-16
Supplement: Supplementary file 1 [file supplementary]

**Table S1.** Scores of the first two axes from principal component analysis (PCA) conducted with leaf functional traits obtained in 2009 and 2018 in three successional stages (early, intermediate and late) in a Brazilian tropical dry forest. Asterisks indicate significant (P < 0.05) Pearson correlations between leaf functional traits and PCA scores.

| **Leaf functional traits** | **PCA scores** | |
| --- | --- | --- |
|  | Axis 1 | Axis 2 |
| Specific leaf area | -0.460 | 0.527* |
| Chlorophyll a/b | 0.875* | 0.395 |
| Total chlorophyll | 0.039 | -0.006 |
| Polyphenols | 0.137* | -0.752 |


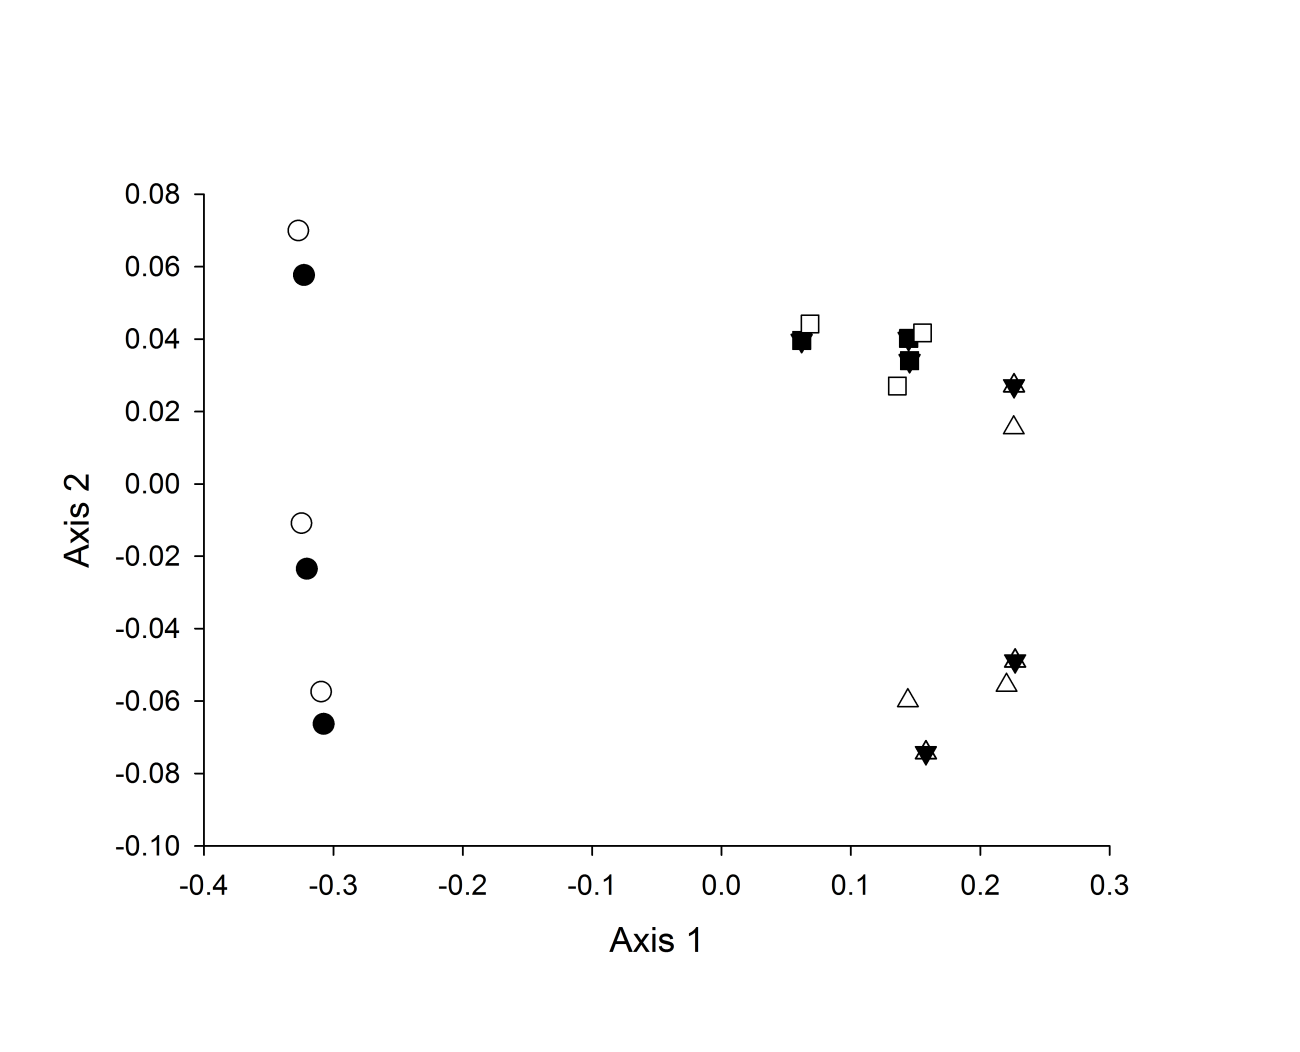


**Figure S1.** Non-Metric Multidimensional Scaling (NMDS) and ANOSIM analysis comparing the species composition of the three successional stages in 2009 and 2018. Filled symbols represent the plots in 2009 and the empty symbols represent plots in 2018. Circles: early stage; triangles: intermediate stage; squares: late stage. No temporal differences were detected for any successional stage (*P* > 0.05).


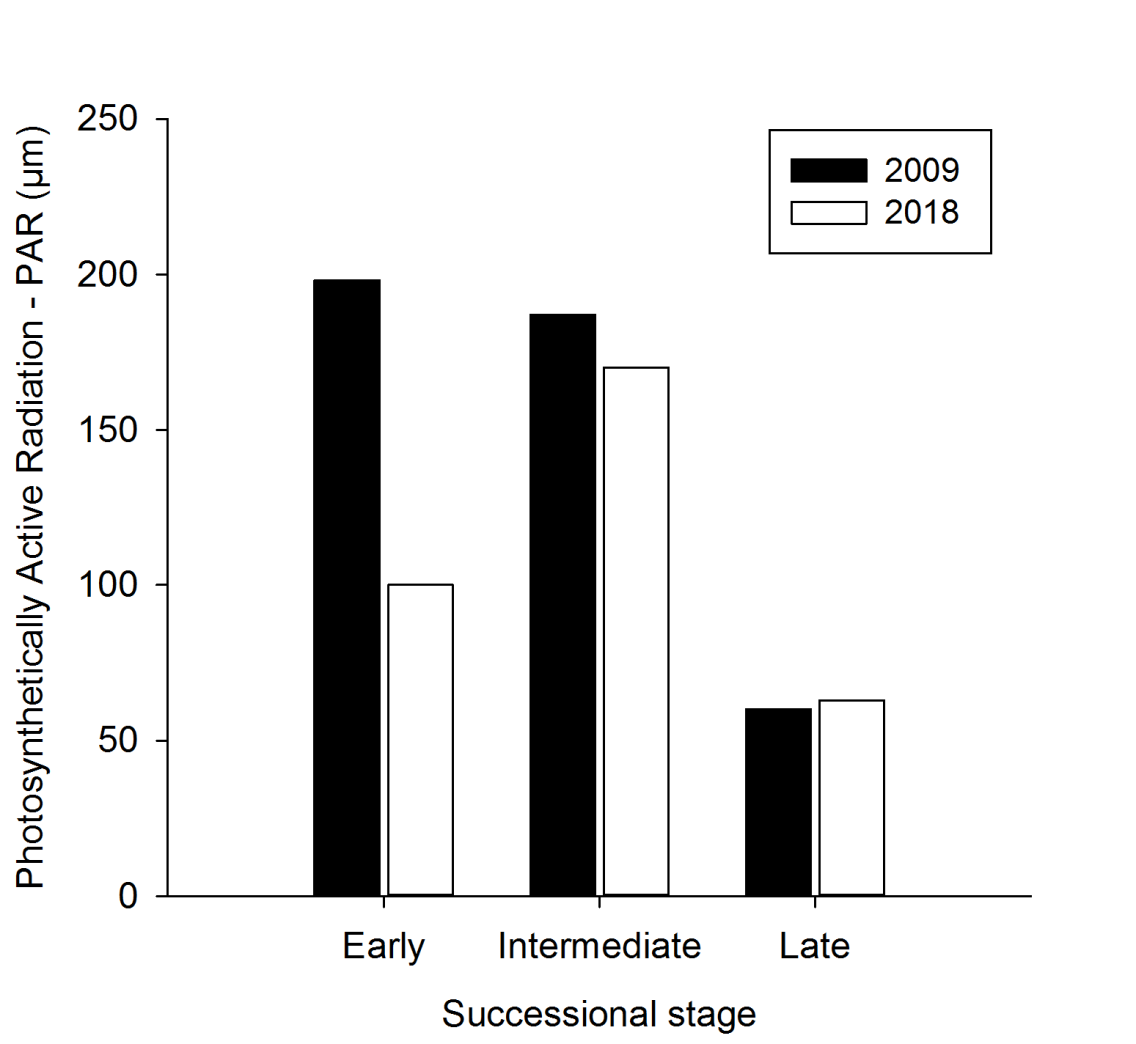


**Figure S2.** Average values (µm) of photosynthetically active radiation (PAR) (Smart Sensor S-LIA-M003) positioned in the understory of one plot per successional stage. Values were obtained for the April 2009 and 2018.
